# Supplementary material
Source: PubMed Central journal article supplement (PMC6371962)
Supplement: jexbio-222-194092-s1.pdf [file jexbio-222-194092-s1.pdf]

**Table S1. Genomic/transcriptomic evidence for the existence of GSEFLamides in the Arthropoda**

| Subphylum        | Class (subclass)                                                                                                                                                                                                                                                                | Order                                                                                                                                                                                                                                                                                                                                                                         | Example species (Accession No.)                                                                                                                                                                                                         |                                                                                                                                                                         |
|------------------|---------------------------------------------------------------------------------------------------------------------------------------------------------------------------------------------------------------------------------------------------------------------------------|-------------------------------------------------------------------------------------------------------------------------------------------------------------------------------------------------------------------------------------------------------------------------------------------------------------------------------------------------------------------------------|-----------------------------------------------------------------------------------------------------------------------------------------------------------------------------------------------------------------------------------------|-------------------------------------------------------------------------------------------------------------------------------------------------------------------------|
| Crustacea        | Branchiopoda                                                                                                                                                                                                                                                                    | Anostraca                                                                                                                                                                                                                                                                                                                                                                     | None found                                                                                                                                                                                                                              |                                                                                                                                                                         |
|                  |                                                                                                                                                                                                                                                                                 | Notostraca                                                                                                                                                                                                                                                                                                                                                                    | <i>Triops cancriformis</i> ( <b>BAYF01005563</b> ); <i>Triops newberryi</i> ( <b>GEHY01007259</b> )                                                                                                                                     |                                                                                                                                                                         |
|                  |                                                                                                                                                                                                                                                                                 | Laevicaudata                                                                                                                                                                                                                                                                                                                                                                  | None found                                                                                                                                                                                                                              |                                                                                                                                                                         |
|                  |                                                                                                                                                                                                                                                                                 | Spinicaudata                                                                                                                                                                                                                                                                                                                                                                  | <i>Eulimnadia texana</i> ( <b>NKDA01000001</b> )                                                                                                                                                                                        |                                                                                                                                                                         |
|                  |                                                                                                                                                                                                                                                                                 | Cyclestherida                                                                                                                                                                                                                                                                                                                                                                 | None found                                                                                                                                                                                                                              |                                                                                                                                                                         |
|                  |                                                                                                                                                                                                                                                                                 | Cladocera                                                                                                                                                                                                                                                                                                                                                                     | <i>Daphnia magna</i> ( <b>LRGB01003056</b> ); <i>Daphnia pulex</i> ( <b>FE418902</b> ; <b>FE418903</b> ; <b>ACJG01004393</b> ); <i>Diaphanosoma celebensis</i> ( <b>GGQP01072647</b> )                                                  |                                                                                                                                                                         |
|                  |                                                                                                                                                                                                                                                                                 | Remipedia                                                                                                                                                                                                                                                                                                                                                                     | None found                                                                                                                                                                                                                              |                                                                                                                                                                         |
|                  |                                                                                                                                                                                                                                                                                 | Cephalocarida                                                                                                                                                                                                                                                                                                                                                                 | None found                                                                                                                                                                                                                              |                                                                                                                                                                         |
|                  |                                                                                                                                                                                                                                                                                 | Maxillopoda (Copepoda)                                                                                                                                                                                                                                                                                                                                                        | Calanoida                                                                                                                                                                                                                               | <i>Calanus finmarchicus</i> ( <b>GBFB01037216</b> )                                                                                                                     |
|                  |                                                                                                                                                                                                                                                                                 |                                                                                                                                                                                                                                                                                                                                                                               | Cyclopoida                                                                                                                                                                                                                              | <i>Eucyclops serrulatus</i> ( <b>GARW01034605</b> ; <b>GARW01034606</b> ); <i>Oithona nana</i> ( <b>FTRT01000010</b> ); <i>Paracyclops nana</i> ( <b>GCJT01011701</b> ) |
|                  | Gelyelloida                                                                                                                                                                                                                                                                     |                                                                                                                                                                                                                                                                                                                                                                               | None found                                                                                                                                                                                                                              |                                                                                                                                                                         |
|                  | Harpacticoida                                                                                                                                                                                                                                                                   |                                                                                                                                                                                                                                                                                                                                                                               | <i>Tigriopus californicus</i> ( <b>JW505134</b> ; <b>JW524533</b> ); <i>Tigriopus japonicus</i> ( <b>GCHA01006330</b> ); <i>Tisbe holothuriae</i> ( <b>HAHV01208940</b> )                                                               |                                                                                                                                                                         |
|                  | Misophrioida                                                                                                                                                                                                                                                                    |                                                                                                                                                                                                                                                                                                                                                                               | None found                                                                                                                                                                                                                              |                                                                                                                                                                         |
|                  | Monstrilloida                                                                                                                                                                                                                                                                   |                                                                                                                                                                                                                                                                                                                                                                               | None found                                                                                                                                                                                                                              |                                                                                                                                                                         |
|                  | Mormonilloida                                                                                                                                                                                                                                                                   |                                                                                                                                                                                                                                                                                                                                                                               | None found                                                                                                                                                                                                                              |                                                                                                                                                                         |
|                  | Platycopioida                                                                                                                                                                                                                                                                   |                                                                                                                                                                                                                                                                                                                                                                               | None found                                                                                                                                                                                                                              |                                                                                                                                                                         |
|                  | Poecilostomatoida                                                                                                                                                                                                                                                               |                                                                                                                                                                                                                                                                                                                                                                               | None found                                                                                                                                                                                                                              |                                                                                                                                                                         |
|                  | Siphonostomatoida                                                                                                                                                                                                                                                               |                                                                                                                                                                                                                                                                                                                                                                               | <i>Caligus rogercresseyi</i> ( <b>GAZX01021255</b> ; <b>GAZX01021254</b> ; <b>LBBU01194569</b> ); <i>Lepeophtheirus salmonis</i> ( <b>HACA01020923</b> ; <b>LBBW01059486</b> ); <i>Tracheliastes polycolpus</i> ( <b>GGOW01002811</b> ) |                                                                                                                                                                         |
|                  | Maxillopoda (Thecostraca)                                                                                                                                                                                                                                                       |                                                                                                                                                                                                                                                                                                                                                                               | Cirripedia                                                                                                                                                                                                                              | <i>Pollicipes pollicipes</i> ( <b>GGCH01051771</b> )                                                                                                                    |
|                  |                                                                                                                                                                                                                                                                                 |                                                                                                                                                                                                                                                                                                                                                                               | Facetotecta                                                                                                                                                                                                                             | None found                                                                                                                                                              |
|                  |                                                                                                                                                                                                                                                                                 |                                                                                                                                                                                                                                                                                                                                                                               | Ascothoracida                                                                                                                                                                                                                           | None found                                                                                                                                                              |
|                  | Maxillopoda (Branchiura)                                                                                                                                                                                                                                                        |                                                                                                                                                                                                                                                                                                                                                                               |                                                                                                                                                                                                                                         | None found                                                                                                                                                              |
|                  | Maxillopoda (Pentastomida)                                                                                                                                                                                                                                                      |                                                                                                                                                                                                                                                                                                                                                                               |                                                                                                                                                                                                                                         | None found                                                                                                                                                              |
|                  | Maxillopoda (Mystacocarida)                                                                                                                                                                                                                                                     |                                                                                                                                                                                                                                                                                                                                                                               |                                                                                                                                                                                                                                         | None found                                                                                                                                                              |
|                  | Maxillopoda (Tantulocarida)                                                                                                                                                                                                                                                     |                                                                                                                                                                                                                                                                                                                                                                               |                                                                                                                                                                                                                                         | None found                                                                                                                                                              |
|                  | Ostracoda                                                                                                                                                                                                                                                                       |                                                                                                                                                                                                                                                                                                                                                                               | None found                                                                                                                                                                                                                              |                                                                                                                                                                         |
|                  | Malacostraca (Eumalacostraca)                                                                                                                                                                                                                                                   | Bathynellacea                                                                                                                                                                                                                                                                                                                                                                 | None found                                                                                                                                                                                                                              |                                                                                                                                                                         |
| Anaspidacea      |                                                                                                                                                                                                                                                                                 | None found                                                                                                                                                                                                                                                                                                                                                                    |                                                                                                                                                                                                                                         |                                                                                                                                                                         |
| Spelaeogriphacea |                                                                                                                                                                                                                                                                                 | None found                                                                                                                                                                                                                                                                                                                                                                    |                                                                                                                                                                                                                                         |                                                                                                                                                                         |
| Thermosbaenacea  |                                                                                                                                                                                                                                                                                 | None found                                                                                                                                                                                                                                                                                                                                                                    |                                                                                                                                                                                                                                         |                                                                                                                                                                         |
| Lophogastrida    |                                                                                                                                                                                                                                                                                 | None found                                                                                                                                                                                                                                                                                                                                                                    |                                                                                                                                                                                                                                         |                                                                                                                                                                         |
| Mysida           |                                                                                                                                                                                                                                                                                 | None found                                                                                                                                                                                                                                                                                                                                                                    |                                                                                                                                                                                                                                         |                                                                                                                                                                         |
| Mictacea         |                                                                                                                                                                                                                                                                                 | None found                                                                                                                                                                                                                                                                                                                                                                    |                                                                                                                                                                                                                                         |                                                                                                                                                                         |
| Amphipoda        |                                                                                                                                                                                                                                                                                 | <i>Hyalella azteca</i> ( <b>XM_018163644</b> ; <b>GEHV01118052</b> ; <b>GEHV01118053</b> ; <b>JODR02014982</b> ); <i>Parhyale hawaiiensis</i> ( <b>LQNS02278091</b> ); <i>Talitrus saltator</i> ( <b>GDUJ01078702</b> )                                                                                                                                                       |                                                                                                                                                                                                                                         |                                                                                                                                                                         |
| Isopoda          |                                                                                                                                                                                                                                                                                 | <i>Proasellus arthrodilus</i> ( <b>HAEQ01103713</b> ); <i>Proasellus cantabricus</i> ( <b>HAER01069123</b> ); <i>Proasellus granadensis</i> ( <b>HAEY01024833</b> ); <i>Proasellus margalefi</i> ( <b>HAFD01019418</b> ); <i>Proasellus parvulus</i> ( <b>HAFG01006587</b> ); <i>Proasellus rectus</i> ( <b>HAFI01120250</b> ); <i>Ligia exotica</i> ( <b>BDMT011533477</b> ) |                                                                                                                                                                                                                                         |                                                                                                                                                                         |
| Euphausiacea     |                                                                                                                                                                                                                                                                                 | <i>Euphausia superba</i> ( <b>GFCS01030727</b> ); <i>Meganyctiphanes norvegica</i> ( <b>GETT01032249</b> )                                                                                                                                                                                                                                                                    |                                                                                                                                                                                                                                         |                                                                                                                                                                         |
| Decapoda         | <i>Astacus astacus</i> ( <b>GEDF01032051</b> ; <b>GEDF01032046</b> ); <i>Cancer borealis</i> ( <b>GEFB01024463</b> ); <i>Carcinus maenas</i> ( <b>GFXF01018114</b> ); <i>Caridina multidentata</i> ( <b>BDMR012243044</b> ); <i>Cherax quadricarinatus</i> ( <b>MH210976</b> ); |                                                                                                                                                                                                                                                                                                                                                                               |                                                                                                                                                                                                                                         |                                                                                                                                                                         |

|             |                             |                 |                                                                                                                                                                                                                                                                                                                                                                                                                                                                                                                                                                                                                                                                                                                                   |
|-------------|-----------------------------|-----------------|-----------------------------------------------------------------------------------------------------------------------------------------------------------------------------------------------------------------------------------------------------------------------------------------------------------------------------------------------------------------------------------------------------------------------------------------------------------------------------------------------------------------------------------------------------------------------------------------------------------------------------------------------------------------------------------------------------------------------------------|
|             |                             |                 | <b>HACK01049432; HACK01072863</b> ); <i>Eriocheir sinensis</i> ( <b>LOIF01001265; GBZW01010051; GFBL01010056</b> ); <i>Homarus americanus</i> ( <b>GEBG01035690; GFDA01138849; GFDA01138850; GFDA01064392; MH615811; MH615812; MH615813</b> ); <i>Jasus edwardsii</i> ( <b>GGHM01077724</b> ); <i>Litopenaeus vannamei</i> ( <b>GFRP01041795; JP369300; JP405994</b> ); <i>Marsupenaeus japonicus</i> ( <b>CI999226</b> ); <i>Palaemon varians</i> ( <b>GFPG01041628; GFPG01046114</b> ); <i>Penaeus monodon</i> ( <b>NIUS011950493</b> ); <i>Procambarus clarkii</i> ( <b>GBEV01013249; GARH01032050; GARH01004165</b> ); <i>Procambarus virginalis</i> ( <b>MRZY010013654</b> ); <i>Scylla paramamosain</i> ( <b>KR078375</b> ) |
|             | Malacostraca (Hoplocarida)  |                 | None found                                                                                                                                                                                                                                                                                                                                                                                                                                                                                                                                                                                                                                                                                                                        |
|             | Malacostraca (Phyllocarida) |                 | None found                                                                                                                                                                                                                                                                                                                                                                                                                                                                                                                                                                                                                                                                                                                        |
| Hexapoda    | Entognatha                  | Collembola      | <i>Folsomia candida</i> ( <b>XM_022110878; LNIX01000045</b> ); <i>Holacanthella duospinosa</i> ( <b>GFPE01084992</b> ); <i>Orchesella cincta</i> ( <b>LJIJ01000312</b> ); <i>Pogonognathellus</i> sp. ( <b>GATD02021554</b> ); <i>Tetradontophora bielansensis</i> ( <b>GAXI02021309</b> )                                                                                                                                                                                                                                                                                                                                                                                                                                        |
|             |                             | Diplura         | <i>Catajapyx aquilonaris</i> ( <b>JYFJ02003565</b> )                                                                                                                                                                                                                                                                                                                                                                                                                                                                                                                                                                                                                                                                              |
|             |                             | Protura         | <i>Acerentomon</i> sp. ( <b>GAXE01002454; GAXE01002455; GAXE01016499</b> )                                                                                                                                                                                                                                                                                                                                                                                                                                                                                                                                                                                                                                                        |
|             | Insecta                     | Zygentoma       | <i>Atelura formicaria</i> ( <b>GAYJ02039606</b> ); <i>Thermobia domestica</i> ( <b>GASN02037847</b> ); <i>Tricholepidion gertschi</i> ( <b>GASO02020345</b> )                                                                                                                                                                                                                                                                                                                                                                                                                                                                                                                                                                     |
|             |                             | Ephemeroptera   | <i>Baetis rhodani</i> ( <b>LVVX01380025</b> ); <i>Ephemerella danica</i> ( <b>AYNC02025439</b> ); <i>Isonychia bicolor</i> ( <b>GAXA02018803</b> )                                                                                                                                                                                                                                                                                                                                                                                                                                                                                                                                                                                |
|             |                             | Odonata         | <i>Calopteryx splendens</i> ( <b>LYUA01002566</b> ); <i>Ladona fulva</i> ( <b>APVN02016086</b> ); <i>Megaloprepus caerulatus</i> ( <b>GEXY01535986</b> )                                                                                                                                                                                                                                                                                                                                                                                                                                                                                                                                                                          |
|             |                             | Hemiptera       | <i>Lygus hesperus</i> ( <b>GBHO01039466</b> )                                                                                                                                                                                                                                                                                                                                                                                                                                                                                                                                                                                                                                                                                     |
|             |                             | Orthoptera      | None found                                                                                                                                                                                                                                                                                                                                                                                                                                                                                                                                                                                                                                                                                                                        |
|             |                             | Mantodea        | None found                                                                                                                                                                                                                                                                                                                                                                                                                                                                                                                                                                                                                                                                                                                        |
|             |                             | Blattodea       | None found                                                                                                                                                                                                                                                                                                                                                                                                                                                                                                                                                                                                                                                                                                                        |
|             |                             | Dermaptera      | None found                                                                                                                                                                                                                                                                                                                                                                                                                                                                                                                                                                                                                                                                                                                        |
|             |                             | Phasmatodea     | None found                                                                                                                                                                                                                                                                                                                                                                                                                                                                                                                                                                                                                                                                                                                        |
|             |                             | Phthiraptera    | None found                                                                                                                                                                                                                                                                                                                                                                                                                                                                                                                                                                                                                                                                                                                        |
|             |                             | Plecoptera      | None found                                                                                                                                                                                                                                                                                                                                                                                                                                                                                                                                                                                                                                                                                                                        |
|             |                             | Grylloblattodea | None found                                                                                                                                                                                                                                                                                                                                                                                                                                                                                                                                                                                                                                                                                                                        |
|             |                             | Thysanoptera    | None found                                                                                                                                                                                                                                                                                                                                                                                                                                                                                                                                                                                                                                                                                                                        |
|             |                             | Diptera         | None found                                                                                                                                                                                                                                                                                                                                                                                                                                                                                                                                                                                                                                                                                                                        |
|             |                             | Hymenoptera     | None found                                                                                                                                                                                                                                                                                                                                                                                                                                                                                                                                                                                                                                                                                                                        |
|             |                             | Lepidoptera     | None found                                                                                                                                                                                                                                                                                                                                                                                                                                                                                                                                                                                                                                                                                                                        |
|             |                             | Mecoptera       | None found                                                                                                                                                                                                                                                                                                                                                                                                                                                                                                                                                                                                                                                                                                                        |
|             |                             | Megaloptera     | None found                                                                                                                                                                                                                                                                                                                                                                                                                                                                                                                                                                                                                                                                                                                        |
|             |                             | Neuroptera      | None found                                                                                                                                                                                                                                                                                                                                                                                                                                                                                                                                                                                                                                                                                                                        |
|             |                             | Raphidioptera   | None found                                                                                                                                                                                                                                                                                                                                                                                                                                                                                                                                                                                                                                                                                                                        |
|             |                             | Siphonaptera    | None found                                                                                                                                                                                                                                                                                                                                                                                                                                                                                                                                                                                                                                                                                                                        |
|             |                             | Strepsiptera    | None found                                                                                                                                                                                                                                                                                                                                                                                                                                                                                                                                                                                                                                                                                                                        |
|             |                             | Trichoptera     | None found                                                                                                                                                                                                                                                                                                                                                                                                                                                                                                                                                                                                                                                                                                                        |
| Chelicerata | Arachnida                   | Acari           | <i>Hypochthonius rufulus</i> ( <b>GEYP01047459; LBFL01003433</b> ); <i>Ixodes ricinus</i> ( <b>JXMZ02002780</b> ); <i>Ixodes scapularis</i> ( <b>XM_002414888; EW840598; PKSA01009712</b> ); <i>Ornithodoros turicata</i> ( <b>GDIE01026007</b> ); <i>Platynothrus peltifer</i> ( <b>GEYZ01012033</b> ); <i>Rhipicephalus microplus</i> ( <b>FG579568</b> ); <i>Sarcoptes scabiei</i> ( <b>BM522045</b> ); <i>Steganacarus magnus</i> ( <b>GEYQ01017742; LBFN01064525</b> ); <i>Tetranychus urticae</i> ( <b>XM_015935096; CAEY01000550</b> )                                                                                                                                                                                     |
|             |                             | Amblypygi       | None found                                                                                                                                                                                                                                                                                                                                                                                                                                                                                                                                                                                                                                                                                                                        |
|             |                             | Araneae         | <i>Latrodectus geometricus</i> ( <b>GBJM01053139</b> ); <i>Latrodectus hesperus</i> ( <b>GBCS01014425; GFDB01000183; JJRX02014372</b> ); <i>Loxosceles reclusa</i> ( <b>JJRW010100076</b> ); <i>Nephila clavipes</i> ( <b>MWRG01026699</b> ); <i>Parasteatoda tepidariorum</i> ( <b>XR_001583087; AOMJ02232695</b> ); <i>Pardosa pseudoannulata</i> ( <b>GCKE01026805</b> ); <i>Stegodyphus mimosarum</i> ( <b>JT036531; AZAQ01120322</b> )                                                                                                                                                                                                                                                                                       |
|             |                             | Opiliones       | None found                                                                                                                                                                                                                                                                                                                                                                                                                                                                                                                                                                                                                                                                                                                        |
|             |                             | Palpigradi      | None found                                                                                                                                                                                                                                                                                                                                                                                                                                                                                                                                                                                                                                                                                                                        |

|                                                                                                                                                                                                                                                                |           |                  |                                                                                                                                                                                                                   |
|----------------------------------------------------------------------------------------------------------------------------------------------------------------------------------------------------------------------------------------------------------------|-----------|------------------|-------------------------------------------------------------------------------------------------------------------------------------------------------------------------------------------------------------------|
|                                                                                                                                                                                                                                                                |           | Pseudoscorpiones | <i>Cordylochernes scorpioides</i> ( <b><u>QEEW01039327</u></b> )                                                                                                                                                  |
|                                                                                                                                                                                                                                                                |           | Ricinulei        | None found                                                                                                                                                                                                        |
|                                                                                                                                                                                                                                                                |           | Schizomida       | None found                                                                                                                                                                                                        |
|                                                                                                                                                                                                                                                                |           | Scorpiones       | <i>Centruroides sculpturatus</i> ( <b><u>XM 023362779</u></b> ; <b><u>AXZI02005370</u></b> ); <i>Mesobuthus martensii</i> ( <b><u>AYEL01074582</u></b> ); <i>Tityus serrulatus</i> ( <b><u>GBZU01013855</u></b> ) |
|                                                                                                                                                                                                                                                                |           | Solifugae        | None found                                                                                                                                                                                                        |
|                                                                                                                                                                                                                                                                |           | Thelyphonida     | None found                                                                                                                                                                                                        |
|                                                                                                                                                                                                                                                                |           | Pycnogonida      | None found                                                                                                                                                                                                        |
|                                                                                                                                                                                                                                                                |           | Merostomata      | <i>Limulus polyphemus</i> ( <b><u>XR 002609941</u></b> ; <b><u>AZTN01025391</u></b> )                                                                                                                             |
| Myriapoda                                                                                                                                                                                                                                                      | Chilopoda |                  | <i>Strigamia maritime</i> ( <b><u>AFFK01019071</u></b> )                                                                                                                                                          |
|                                                                                                                                                                                                                                                                | Diplopoda |                  | None found                                                                                                                                                                                                        |
|                                                                                                                                                                                                                                                                | Pauropoda |                  | None found                                                                                                                                                                                                        |
|                                                                                                                                                                                                                                                                | Symphyla  |                  | <i>Symphylella vulgaris</i> ( <b><u>GAKX01061676</u></b> )                                                                                                                                                        |
| Data from: Bao et al., 2015; Christie, 2014b, 2014d, 2014f, 2015a, 2015b, 2015c; Christie and Chi, 2015a, 2015b, 2015c; Christie and Pascual, 2016; Christie et al., 2015, 2017a, 2017b, 2018a, 2018b; Nguyen et al., 2016; Veenstra et al., 2012; this study. |           |                  |                                                                                                                                                                                                                   |

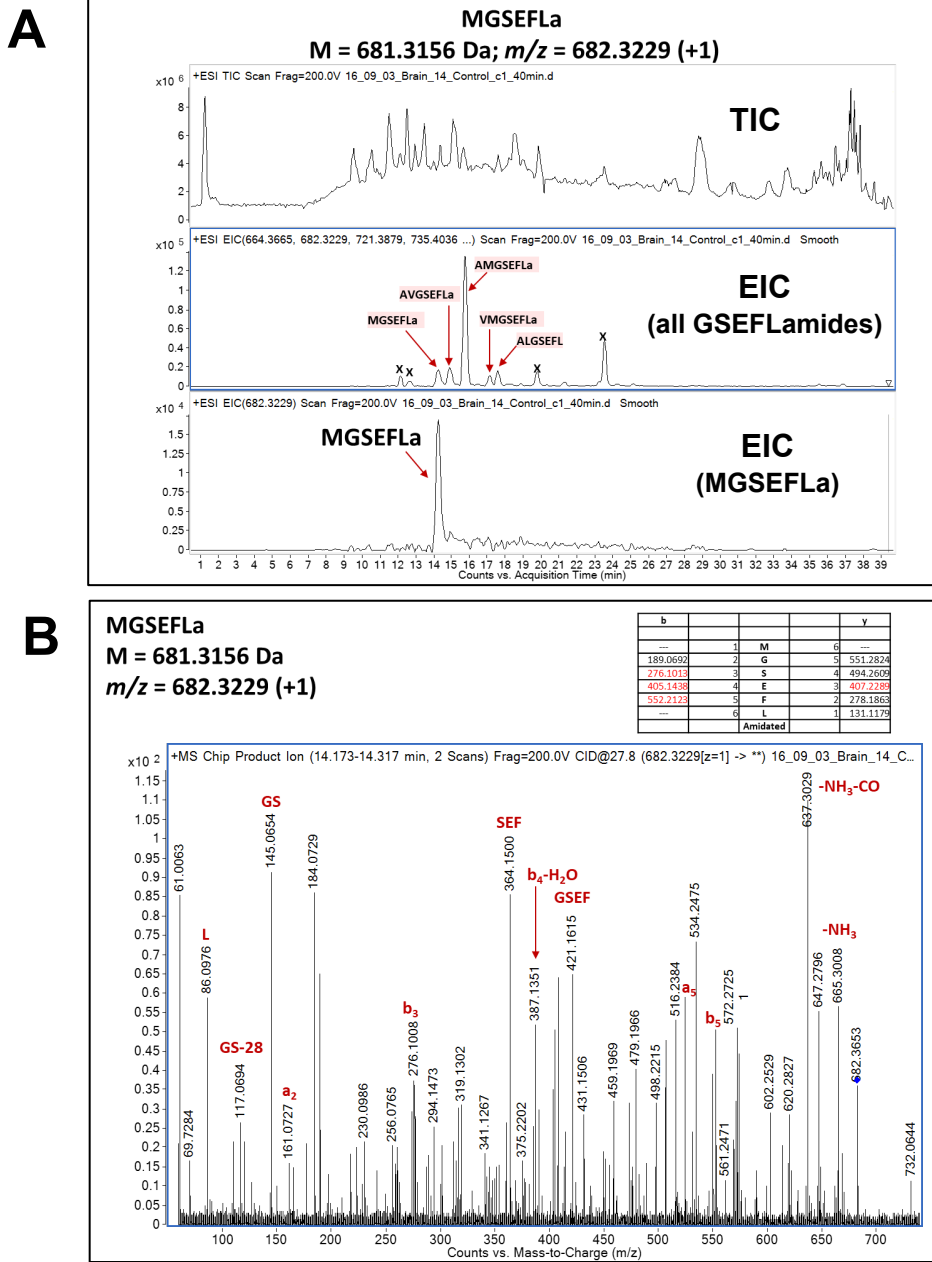

**Figure S1. Chromatographic and mass spectrometric data in support of the identification of MGSEFLamide** (A) Total ionization chromatogram (TIC) for *H. americanus* supraoesophageal ganglion (brain) extract, summed extracted ion chromatograms (EICs) for the  $[M+H]^+$  peaks from IGSEFLa ( $m/z$  664.3665), MGSEFLa, ( $m/z$  682.3229), AVGSEFLa, ( $m/z$  721.3880), AMGSEFLa, ( $m/z$  753.3600), VMGSEFLa, ( $m/z$  781.3914), and ALGSEFLa, ( $m/z$  735.4036) and EIC for only MGSEFLa, ( $m/z$  682.3229); “X” indicates that the signal does not originate from a GSEFLamide peptide; (B) MS/MS spectrum for the  $m/z$  682.32,  $[M+H]^+$  ion from MGSEFLa at a collision energy of 27.8 eV. The assigned sequence was supported by a complete series of N-terminus containing b-type product ions, many of which lost CO to produce a-type ions. C-terminus containing y-type ions provided additional sequence support, as did the detection of internal product ions, including GS, SEF, GSEF and immonium ions, including peaks for L and M. Monoisotopic masses are displayed.

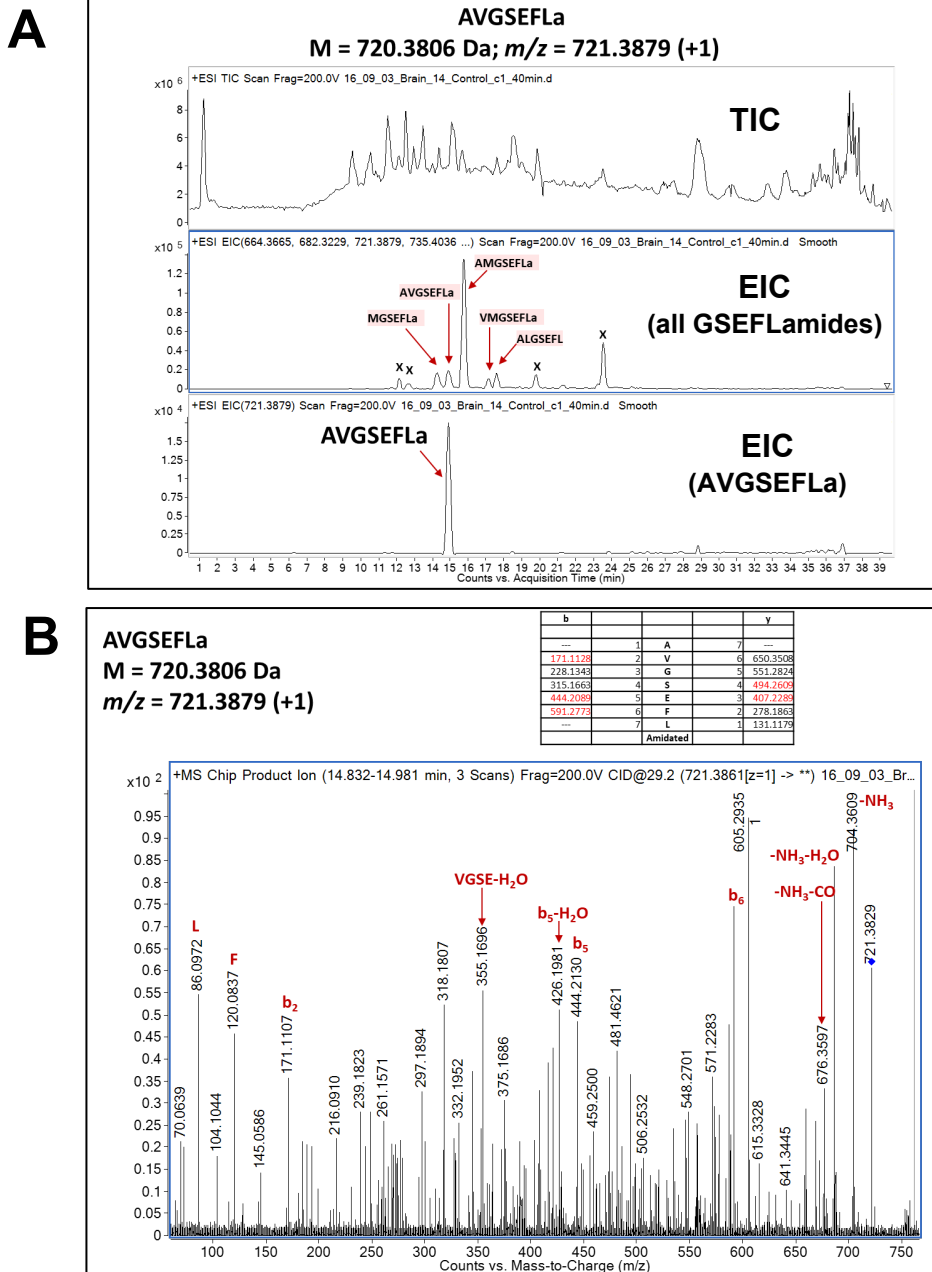

**Figure S2. Chromatographic and mass spectrometric data in support of the identification of AVGSEFLamide.** (A) Total ionization chromatogram (TIC) for *H. americanus* supraoesophageal ganglion (brain) extract, summed extracted ion chromatograms (EICs) for the  $[M+H]^+$  peaks from IGSEFLa ( $m/z$  664.3665), MGSEFLa, ( $m/z$  682.3229), AVGSEFLa, ( $m/z$  721.3880), AMGSEFLa, ( $m/z$  753.3600), VMGSEFLa, ( $m/z$  781.3914), and ALGSEFLa, ( $m/z$  735.4036) and EIC for only AVGSEFLa, ( $m/z$  721.3880); “X” indicates that the signal does not originate from a GSEFLamide peptide; (B) MS/MS spectrum for the  $m/z$  721.39,  $[M+H]^+$  ion from AVGSEFLa at a collision energy of 29.2 eV. The assigned sequence was supported by a partial series of N-terminus containing b-type product ions, many of which lost CO to produce a-type ions. C-terminus containing y-type ions provided additional sequence support, as did the detection of internal product ions, including VGSE and immonium ions, including peaks for V, L and F. Monoisotopic masses are displayed.

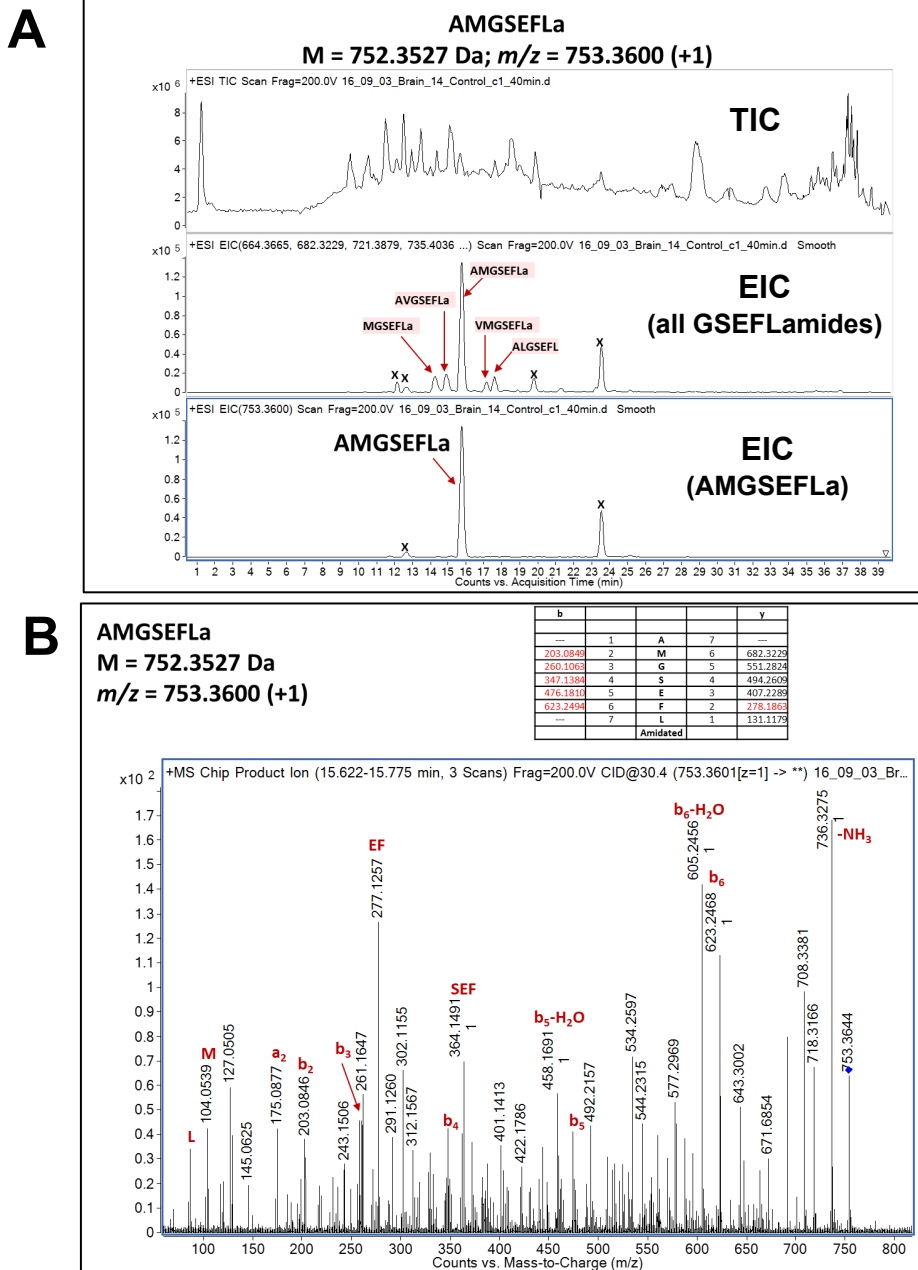

**Figure S3. Chromatographic and mass spectrometric data in support of the identification of AMGSEFLamide.** (A) Total ionization chromatogram (TIC) for *H. americanus* supraoesophageal ganglion (brain) extract, summed extracted ion chromatograms (EICs) for the  $[M+H]^+$  peaks from IGSEFLa ( $m/z$  664.3665), MGSEFLa, ( $m/z$  682.3229), AVGSEFLa, ( $m/z$  721.3880), AMGSEFLa, ( $m/z$  753.3600), VMGSEFLa, ( $m/z$  781.3914), and ALGSEFLa, ( $m/z$  735.4036) and EIC for only AMGSEFLa, ( $m/z$  753.3600); “X” indicates that the signal does not originate from a GSEFLamide peptide; (B) MS/MS spectrum for the  $m/z$  753.36,  $[M+H]^+$  ion from AMGSEFLa at a collision energy of 30.4 eV. The assigned sequence was supported by a complete series of N-terminus containing b-type product ions, many of which lost CO to produce a-type ions. C-terminus containing y-type ions provided additional sequence support, as did the detection of internal product ions, including EF and SEF and immonium ions, including peaks for L, M and F. Monoisotopic masses are displayed.

**A**

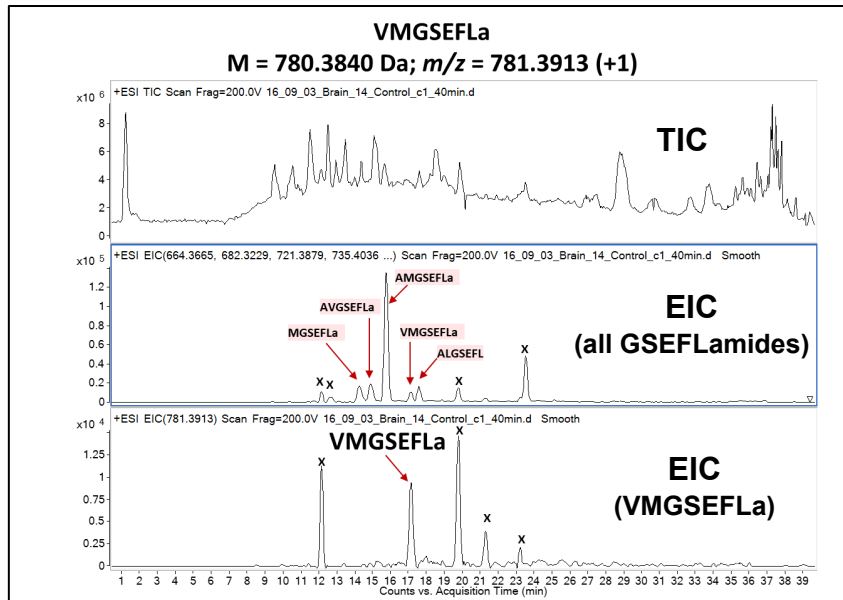

**B**

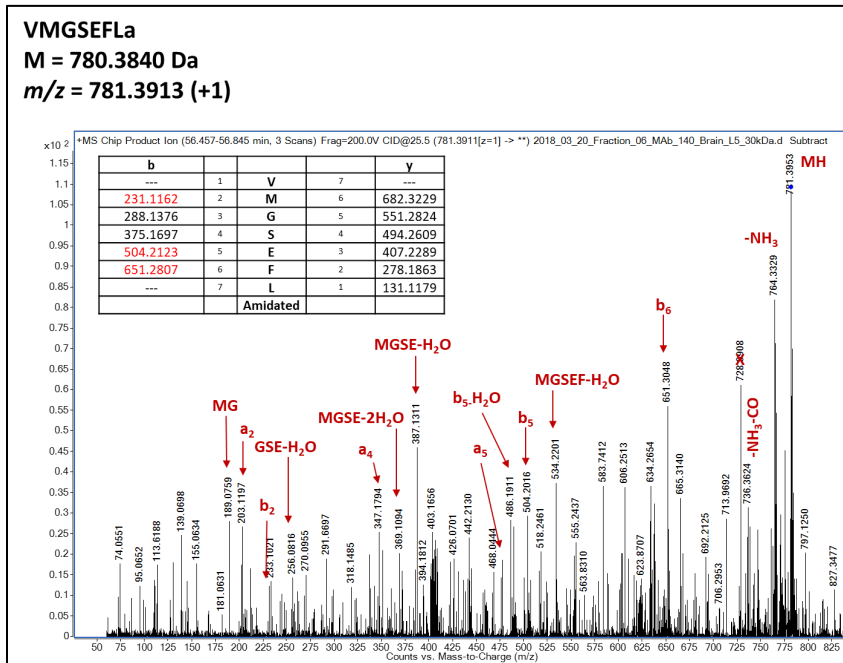

**Figure S4. Chromatographic and mass spectrometric data in support of the identification of VMGSEFLamide.** (A) Total ionization chromatogram (TIC) for *H. americanus* supraoesophageal ganglion (brain) extract, summed extracted ion chromatograms (EICs) for the  $[M+H]^+$  peaks from IGSEFLa ( $m/z$  664.3665), MGSEFLa, ( $m/z$  682.3229), AVGSEFLa, ( $m/z$  721.3880), AMGSEFLa, ( $m/z$  753.3600), VMGSEFLa, ( $m/z$  781.3914), and ALGSEFLa, ( $m/z$  735.4036) and EIC for only VMGSEFLa, ( $m/z$  781.3914); “X” indicates that the signal does not originate from a GSEFLamide peptide; (B) MS/MS spectrum for the  $m/z$  781.39,  $[M+H]^+$  ion from VMGSEFLa at a collision energy of 25.5 eV. The assigned sequence was supported by a partial series of N-terminus containing b-type product ions, many of which lost CO to produce a-type ions. The detection of internal product ions, including MS, GSE, and MGSE and immonium ions provided additional support. Monoisotopic masses are displayed.

**A**

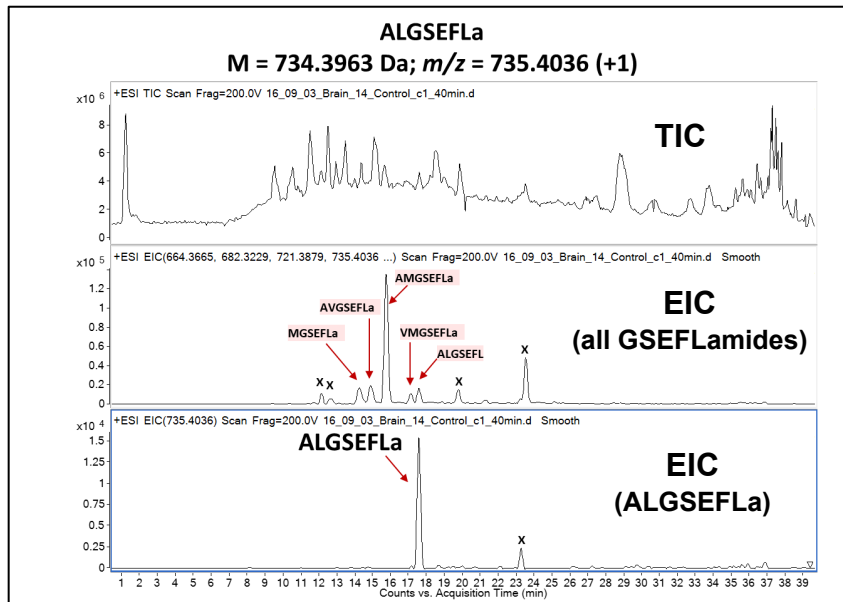

**B**

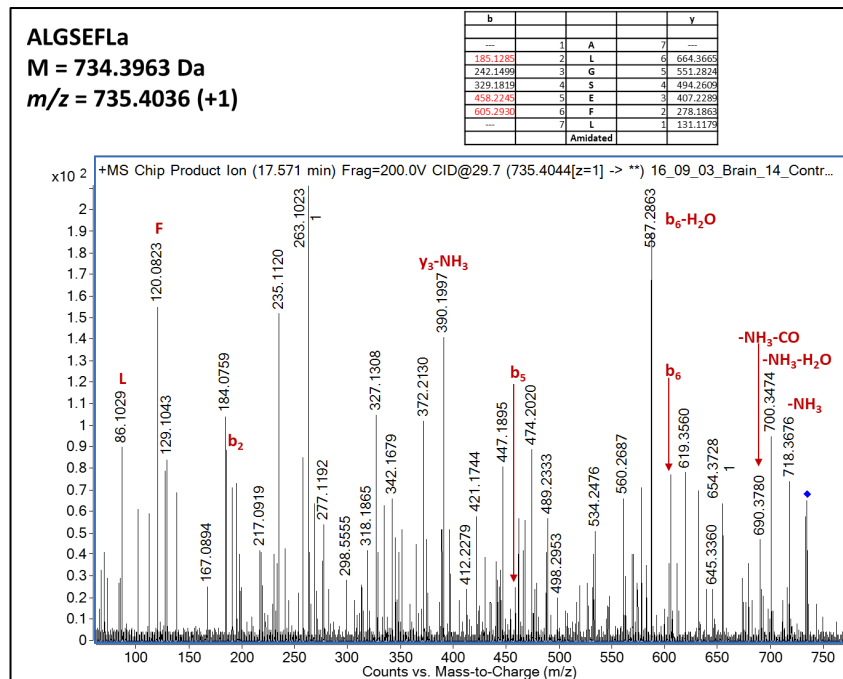

**Figure S5. Chromatographic and mass spectrometric data in support of the identification of ALGSEFLamide.** (A) Total ionization chromatogram (TIC) for *H. americanus* supraoesophageal ganglion (brain) extract, summed extracted ion chromatograms (EICs) for the  $[M+H]^+$  peaks from IGSEFLa ( $m/z$  664.3665), MGSEFLa, ( $m/z$  682.3229), AVGSEFLa, ( $m/z$  721.3880), AMGSEFLa, ( $m/z$  753.3600), VMGSEFLa, ( $m/z$  781.3914), and ALGSEFLa, ( $m/z$  735.4036) and EIC for only ALGSEFLa, ( $m/z$  735.4036); “X” indicates that the signal does not originate from a GSEFLamide peptide; (B) MS/MS spectrum for the  $m/z$  735.40,  $[M+H]^+$  ion from ALGSEFLa at a collision energy of 29.7 eV. The assigned sequence was supported by a partial series of N-terminus containing b-type product ions, many of which lost CO to produce a-type ions. C-terminus containing y-type ions provided additional sequence support, as did the detection of internal product ions and immonium ions, including peaks for L and F. Monoisotopic masses are displayed.
